# Supplementary material for: Inferring and comparing metabolism across heterogeneous sets of annotated genomes using AuCoMe
Source: HighWire-hosted journal article supplement (doi:10.1101/gr.277056.122), 2023-06-01
Supplement: Supplemental_File_S2.zip [file Table_S1_description_bacterial_dataset.xlsx]

## Sheet: Sheet 1
Strain	Assembly	Genome Assembly used	Link
Escherichia coli str. K-12 substr. MG1655	GCF_000005845.2	ASM584v2	https://www.ncbi.nlm.nih.gov/assembly/GCF_000005845.2
Escherichia coli str. K-12 substr. W3110	GCF_000010245.2	ASM1024v1	https://www.ncbi.nlm.nih.gov/assembly/GCF_000010245.2
Escherichia coli IAI1	GCF_000026265.1	ASM2626v1	https://www.ncbi.nlm.nih.gov/assembly/GCF_000026265.1
Escherichia coli 55989	GCF_000026245.1	ASM2624v1	https://www.ncbi.nlm.nih.gov/assembly/GCF_000026245.1
Shigella boydii Sb227	GCF_000012025.1	CP000036.1	https://www.ncbi.nlm.nih.gov/assembly/GCF_000012025.1
Shigella sonnei Ss046	GCF_000092525.1	CP000038.1	https://www.ncbi.nlm.nih.gov/assembly/GCF_000092525.1
Shigella flexneri 2a str. 301	GCF_000006925.2	AE005674.2	https://www.ncbi.nlm.nih.gov/assembly/GCF_000006925.2
Shigella flexneri 2a str. 2457T	GCF_000007405.1	AE014073.1	https://www.ncbi.nlm.nih.gov/assembly/GCF_000007405.1
Shigella flexneri 5 str. 8401	GCF_000013585.1	CP000266.1	https://www.ncbi.nlm.nih.gov/assembly/GCF_000013585.1
Escherichia coli IAI39	GCF_000026345.1	ASM2634v1	https://www.ncbi.nlm.nih.gov/assembly/GCF_000026345.1
Shigella dysenteriae Sd197	GCF_000012005.1	CP000034.1	https://www.ncbi.nlm.nih.gov/assembly/GCF_000012005.1
Escherichia coli O157:H7 str. EDL933	GCA_000006665.1	ASM666v1	https://www.ncbi.nlm.nih.gov/assembly/GCA_000006665.1
Escherichia coli O157:H7 str. Sakai	GCF_000008865.2	ASM886v2	https://www.ncbi.nlm.nih.gov/assembly/GCF_000008865.2
Escherichia coli UMN026	GCF_000026325.1	ASM2632v2	https://www.ncbi.nlm.nih.gov/assembly/GCF_000026325.1
Escherichia coli UTI89	GCF_000013265.1	ASM1326v1	https://www.ncbi.nlm.nih.gov/assembly/GCF_000013265.1
Escherichia coli APEC O1	GCF_000014845.1	ASM1484v1	https://www.ncbi.nlm.nih.gov/assembly/GCF_000014845.1
Escherichia coli S88	GCF_000026285.1	ASM2628v2	https://www.ncbi.nlm.nih.gov/assembly/GCF_000026285.1
Escherichia coli CFT073	GCF_000007445.1	ASM744v1	https://www.ncbi.nlm.nih.gov/assembly/GCF_000007445.1
Escherichia coli ED1a	GCF_000026305.1	ASM2630v1	https://www.ncbi.nlm.nih.gov/assembly/GCF_000026305.1
Escherichia coli 536	GCF_000013305.1	CP000247.1	https://www.ncbi.nlm.nih.gov/assembly/GCF_000013305.1
Escherichia coli ATCC 8739	GCF_003591595.1	ASM359159v1	https://www.ncbi.nlm.nih.gov/assembly/GCF_003591595.1
Escherichia coli O139:H28 str. E24377A	GCF_000017745.1	ASM1774v1	https://www.ncbi.nlm.nih.gov/assembly/GCF_000017745.1
Escherichia coli SE11	GCF_000010385.1	ASM1038v1	https://www.ncbi.nlm.nih.gov/assembly/GCF_000010385.1
Escherichia coli LF82	GCF_000284495.1	ASM28449v1	https://www.ncbi.nlm.nih.gov/assembly/GCF_000284495.1
Escherichia coli O127:H6 str. E2348/69	GCA_000026545.1	FM180568.1	https://www.ncbi.nlm.nih.gov/assembly/GCA_000026545.1
Escherichia coli O157:H7 str. EC4115	GCF_000021125.1	ASM2112v1	https://www.ncbi.nlm.nih.gov/assembly/GCF_000021125.1
Escherichia coli HS	GCF_000017765.1	ASM1776v1	https://www.ncbi.nlm.nih.gov/assembly/GCF_000017765.1
Escherichia coli 042	GCF_000027125.1	ASM2712v1	https://www.ncbi.nlm.nih.gov/assembly/GCF_000027125.1
Escherichia coli SMS-3-5	GCF_000019645.1	ASM1964v1	https://www.ncbi.nlm.nih.gov/assembly/GCF_000019645.1
