# Supplementary material for: Inferring and comparing metabolism across heterogeneous sets of annotated genomes using AuCoMe
Source: HighWire-hosted journal article supplement (doi:10.1101/gr.277056.122), 2023-06-01
Supplement: Supplemental_File_S4.zip [file Table_S2_description_fungal_dataset.xlsx]

## Sheet: Sheet 1
Strain	Assembly	Genome Assembly used	Link
Aspergillus clavatus NRRL 1	GCA_000002715.1	ASM271v1	https://www.ncbi.nlm.nih.gov/assembly/GCF_000002715.2
Aspergillus flavus NRRL3357	GCA_000006275.2	JCVI-afl1-v2.0	https://www.ncbi.nlm.nih.gov/assembly/GCF_000006275.2
Aspergillus fumigatus	GCA_012656185.1	ASM1265618v1	https://www.ncbi.nlm.nih.gov/assembly/GCA_012656185.1
Aspergillus nidulans FGSC A4	GCA_000011425.1	ASM1142v1	https://www.ncbi.nlm.nih.gov/assembly/GCA_000011425.1
Aspergillus niger CBS 513.88	GCA_000002855.2	ASM285v2	https://www.ncbi.nlm.nih.gov/assembly/GCA_000002855.2
Aspergillus oryzae 3.042	GCA_000269785.2	AspOry3042	https://www.ncbi.nlm.nih.gov/assembly/GCA_000269785.2
Aspergillus terreus NIH2624	GCA_000149615.1	ASM14961v1	https://www.ncbi.nlm.nih.gov/assembly/GCF_000149615.1
Batrachochytrium dendrobatidis JAM81	GCA_000203795.1	v1.0	https://www.ncbi.nlm.nih.gov/assembly/GCF_000203795.1
Batrachochytrium dendrobatidis JEL423	GCA_000149865.1	BD_JEL423	https://www.ncbi.nlm.nih.gov/assembly/GCA_000149865.1
Botrytis cinerea B05.10	GCA_000143535.4	ASM14353v4	https://www.ncbi.nlm.nih.gov/assembly/GCF_000143535.2
Caenorhabditis elegans	GCA_000002985.3	WBcel235	https://www.ncbi.nlm.nih.gov/assembly/GCF_000002985.6
Candida albicans SC5314	GCA_000182965.3	ASM18296v3	https://www.ncbi.nlm.nih.gov/assembly/GCF_000182965.3
Candida albicans WO-1	GCA_000149445.2	ASM14944v2	https://www.ncbi.nlm.nih.gov/assembly/GCA_000149445.2
Candida glabrata CBS138	GCA_000002545.2	ASM254v2	https://www.ncbi.nlm.nih.gov/assembly/GCF_000002545.3
Meyerozyma guilliermondii ATCC 6260	GCA_000149425.1	ASM14942v1	https://www.ncbi.nlm.nih.gov/assembly/GCF_000149425.1
Clavispora lusitaniae P1	GCA_009498055.1	ASM949805v1	https://www.ncbi.nlm.nih.gov/assembly/GCA_009498055.1
Candida parapsilosis CDC 317	GCA_000182765.2	ASM18276v2	https://www.ncbi.nlm.nih.gov/assembly/GCA_000182765.2
Candida tropicalis MYA-3404	GCA_000006335.3	ASM633v3	https://www.ncbi.nlm.nih.gov/assembly/GCF_000006335.3
Bipolaris maydis C5	GCA_000338975.1	CocheC5_3	https://www.ncbi.nlm.nih.gov/assembly/GCA_000338975.1
Chaetomium globosum CBS 148.51	GCA_000143365.1	ASM14336v1	https://www.ncbi.nlm.nih.gov/assembly/GCF_000143365.1
Coccidioides immitis H538.4	GCA_000149815.1	ASM14981v1	https://www.ncbi.nlm.nih.gov/assembly/GCA_000149815.1
Coccidioides immitis RMSCC 2394	GCA_000149895.1	ASM14989v1	https://www.ncbi.nlm.nih.gov/assembly/GCA_000149895.1
Coccidioides immitis RMSCC 3703	GCA_000150085.1	ASM15008v1	https://www.ncbi.nlm.nih.gov/assembly/GCA_000150085.1
Coccidioides immitis RS	GCA_000149335.2	ASM14933v2	https://www.ncbi.nlm.nih.gov/assembly/GCF_000149335.2
Coccidioides posadasii RMSCC 3488	GCA_000150055.1	ASM15005v1	https://www.ncbi.nlm.nih.gov/assembly/GCA_000150055.1
Coccidioides posadasii Silveira	GCA_000170175.2	CPS2	https://www.ncbi.nlm.nih.gov/assembly/GCA_000170175.2
Coprinopsis cinerea okayama7\#130	GCA_000182895.1	CC3	https://www.ncbi.nlm.nih.gov/assembly/GCF_000182895.1
Cryptococcusgattii Ru294	GCA_000836355.1	Cryp_gatt_Ru294_V1	https://www.ncbi.nlm.nih.gov/assembly/GCA_000836355.1
Cryptococcus gattii WM276	GCA_000185945.1	ASM18594v1	https://www.ncbi.nlm.nih.gov/assembly/GCF_000185945.1
Cryptococcus neoformans var. grubii H99	GCA_000149245.3	CNA3	https://www.ncbi.nlm.nih.gov/assembly/GCF_000149245.1
Cryptococcus neoformans var. neoformans JEC21	GCA_000091045.1	ASM9104v1	https://www.ncbi.nlm.nih.gov/assembly/GCF_000091045.1
Debaryomyces hansenii CBS767	GCA_000006445.2	ASM644v2	https://www.ncbi.nlm.nih.gov/assembly/GCF_000006445.2
Drosophila melanogaster	GCA_000001215.4	Release 6 plus ISO1 MT	https://www.ncbi.nlm.nih.gov/assembly/GCF_000001215.4
Encephalitozoon cuniculi GB-M1	GCA_000091225.1	ASM9122v1	https://www.ncbi.nlm.nih.gov/assembly/GCF_000091225.1
Eremothecium gossypii ATCC 10895	GCA_000091025.4	ASM9102v4	https://www.ncbi.nlm.nih.gov/assembly/GCF_000091025.4
Fusarium graminearum PH-1	GCA_000240135.3	ASM24013v3	https://www.ncbi.nlm.nih.gov/assembly/GCF_000240135.3
Fusarium oxysporum f. sp. lycopersici 4287	GCA_000149955.2	ASM14995v2	https://www.ncbi.nlm.nih.gov/assembly/GCF_000149955.1
Histoplasma capsulatum NAm1	GCA_000149585.1	ASM14958v1	https://www.ncbi.nlm.nih.gov/assembly/GCF_000149585.1
Fusarium verticillioides 7600	GCA_000149555.1	ASM14955v1	https://www.ncbi.nlm.nih.gov/assembly/GCF_000149555.1
Kluyveromyces lactis NRRL Y-1140	GCA_000002515.1	ASM251v1	https://www.ncbi.nlm.nih.gov/assembly/GCF_000002515.2
Laccaria bicolor S238N-H82	GCA_000143565.1	V1.0	https://www.ncbi.nlm.nih.gov/assembly/GCF_000143565.1
Lodderomyces elongisporus NRRL YB-4239	GCA_000149685.1	ASM14968v1	https://www.ncbi.nlm.nih.gov/assembly/GCF_000149685.1
Pyricularia grisea strain NI907	GCA_004355905.1	ASM435590v1	https://www.ncbi.nlm.nih.gov/assembly/GCF_004355905.1
Malassezia globosa CBS 7966	GCA_000181695.1	ASM18169v1	https://www.ncbi.nlm.nih.gov/assembly/GCF_000181695.1
Monosiga brevicollis MX1	GCA_000002865.1	V1.0	https://www.ncbi.nlm.nih.gov/assembly/GCF_000002865.3
Mycosphaerella fijiensis CIRAD86	GCA_000340215.1	Mycfi2	https://www.ncbi.nlm.nih.gov/assembly/GCF_000340215.1
Mycosphaerella graminicola IPO323	GCA_000219625.1	MYCGR v2.0	https://www.ncbi.nlm.nih.gov/assembly/GCF_000219625.1
Nectria haematococca mpVI 77-13-4	GCA_000151355.1	v2.0	https://www.ncbi.nlm.nih.gov/assembly/GCF_000151355.1
Neosartorya fischeri NRRL 181	GCA_000149645.3	ASM14964v3	https://www.ncbi.nlm.nih.gov/assembly/GCF_000149645.2
Neurospora crassa OR74A	GCA_000182925.2	NC12	https://www.ncbi.nlm.nih.gov/assembly/GCF_000182925.2
Paracoccidioides brasiliensis Pb03	GCA_000150475.2	Paracocci_br_ Pb03_V2	https://www.ncbi.nlm.nih.gov/assembly/GCA_000150475.2
Paracoccidioides brasiliensis Pb18	GCA_000150735.2	Paracocci_br_ Pb18_V2	https://www.ncbi.nlm.nih.gov/assembly/GCF_000150735.1
Paracoccidioides brasiliensis Pb300	GCA_001713645.1	ASM171364v1	https://www.ncbi.nlm.nih.gov/assembly/GCA_001713645.1
Phycomyces blakesleeanus NRRL 1555(-)	GCA_001638985.2	Phybl2	https://www.ncbi.nlm.nih.gov/assembly/GCF_001638985.1
Pichia stipitis CBS 6054	GCA_000209165.1	ASM20916v1	https://www.ncbi.nlm.nih.gov/assembly/GCF_000209165.1
Podospora anserina S mat+	GCA_000226545.1	ASM22654v1	https://www.ncbi.nlm.nih.gov/assembly/GCF_000226545.1
Postia placenta MAD-698-R-SB12	GCA_002117355.1	PosplRSB12_1	https://www.ncbi.nlm.nih.gov/assembly/GCF_002117355.1
Puccinia graminis f. sp. tritici CRL 75-36-700-3	GCA_000149925.1	ASM14992v1	https://www.ncbi.nlm.nih.gov/assembly/GCF_000149925.1
Pyrenophora tritici-repentis Pt-1C-BFP	GCA_000149985.1	ASM14998v1	https://www.ncbi.nlm.nih.gov/assembly/GCF_000149985.1
Rhizopus delemar RA 99-880	GCA_000149305.1	RO3	https://www.ncbi.nlm.nih.gov/assembly/GCA_000149305.1
Naumovozyma castellii CBS 4309	GCA_000237345.1	ASM23734v1	https://www.ncbi.nlm.nih.gov/assembly/GCF_000237345.1
Saccharomyces cerevisiae GLBRCY22-3	GCA_001634645.1	GLBRCY22-3	https://www.ncbi.nlm.nih.gov/assembly/GCA_001634645.1
Saccharomyces cerevisiae S288C	GCA_000146045.2	R64	https://www.ncbi.nlm.nih.gov/assembly/GCF_000146045.2
Saccharomyces cerevisiae YJM789	GCA_000181435.1	ASM18143v1	https://www.ncbi.nlm.nih.gov/assembly/GCA_000181435.1
Saccharomyces kudriavzevii IFO 1802	GCA_000167075.2	Saccharomyces_kudriavzevii_strain_ IFO1802_v1.0	https://www.ncbi.nlm.nih.gov/assembly/GCA_000167075.2
Schizosaccharomyces japonicus yFS275	GCA_000149845.2	SJ5	https://www.ncbi.nlm.nih.gov/assembly/GCF_000149845.2
Schizosaccharomyces octosporus yFS286	GCA_000150505.2	SO6	https://www.ncbi.nlm.nih.gov/assembly/GCF_000150505.1
Schizosaccharomyces pombe 972h-	GCA_000002945.2	ASM294v2	https://www.ncbi.nlm.nih.gov/assembly/GCF_000002945.1
Sclerotinia sclerotiorum 1980 UF-70	GCA_000146945.2	ASM14694v2	https://www.ncbi.nlm.nih.gov/assembly/GCF_000146945.2
Parastagonospora nodorum SN15	GCA_000146915.2	ASM14691v2	https://www.ncbi.nlm.nih.gov/assembly/GCF_000146915.1
Trichoderma atroviride IMI 206040	GCA_000171015.2	TRIAT v2.0	https://www.ncbi.nlm.nih.gov/assembly/GCF_000171015.1
Trichoderma reesei QM6a	GCA_000167675.2	v2.0	https://www.ncbi.nlm.nih.gov/assembly/GCF_000167675.1
Trichoderma virens Gv29-8	GCA_000170995.2	TRIVI v2.0	https://www.ncbi.nlm.nih.gov/assembly/GCF_000170995.1
Uncinocarpus reesii 1704	GCA_000003515.2	ASM351v2	https://www.ncbi.nlm.nih.gov/assembly/GCF_000003515.1
Ustilago maydis 521	GCA_000328475.2	Umaydis521_2.0	https://www.ncbi.nlm.nih.gov/assembly/GCF_000328475.2
Verticillium dahliae VdLs.17	GCA_000150675.2	ASM15067v2	https://www.ncbi.nlm.nih.gov/assembly/GCF_000150675.1
Yarrowia lipolytica CLIB89(W29)	GCA_001761485.1	ASM176148v1	https://www.ncbi.nlm.nih.gov/assembly/GCA_001761485.1
